# Supplementary material for: DNA Methylation Mediates lncRNA2919 Regulation of Hair Follicle Regeneration
Source: MDPI journal article supplement (doi:10.3390/ijms23169481), 2022-08-22
Supplement: s1 [file s1]

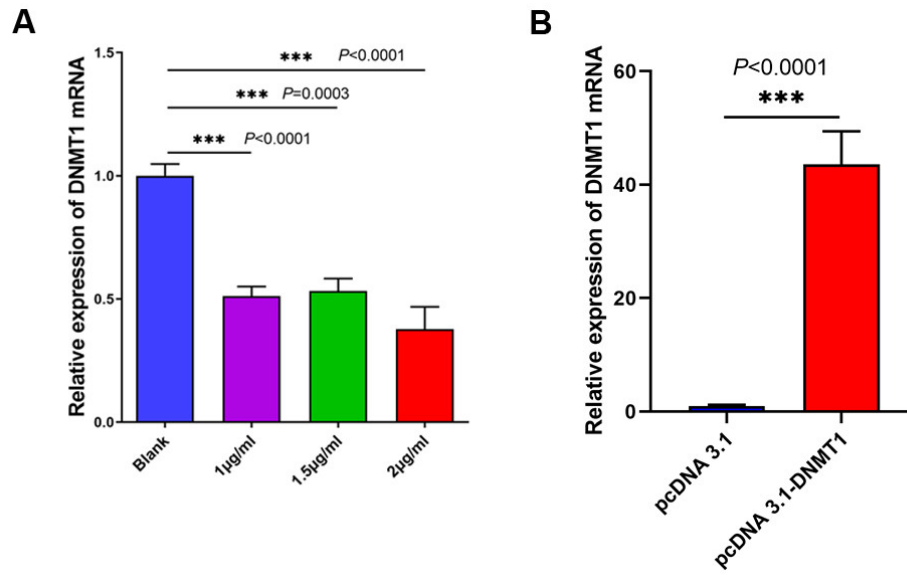

**Figure S2.** (A) 5-Aza-dc negatively regulated DNMT1 expression in DPCs. (B) The DNMT1 mRNA expression level after transfection of pcDNA3.1-DNMT1 in DPCs. Data are presented as mean  $\pm$ SEM. A two-tailed paired t-test was used for data analyses. For significance, \*\*\*  $P < 0.001$ .
