# Supplementary figures and images for: DNA Methylation Mediates lncRNA2919 Regulation of Hair Follicle Regeneration
Source: MDPI journal article supplement (doi:10.3390/ijms23169481), 2022-08-22

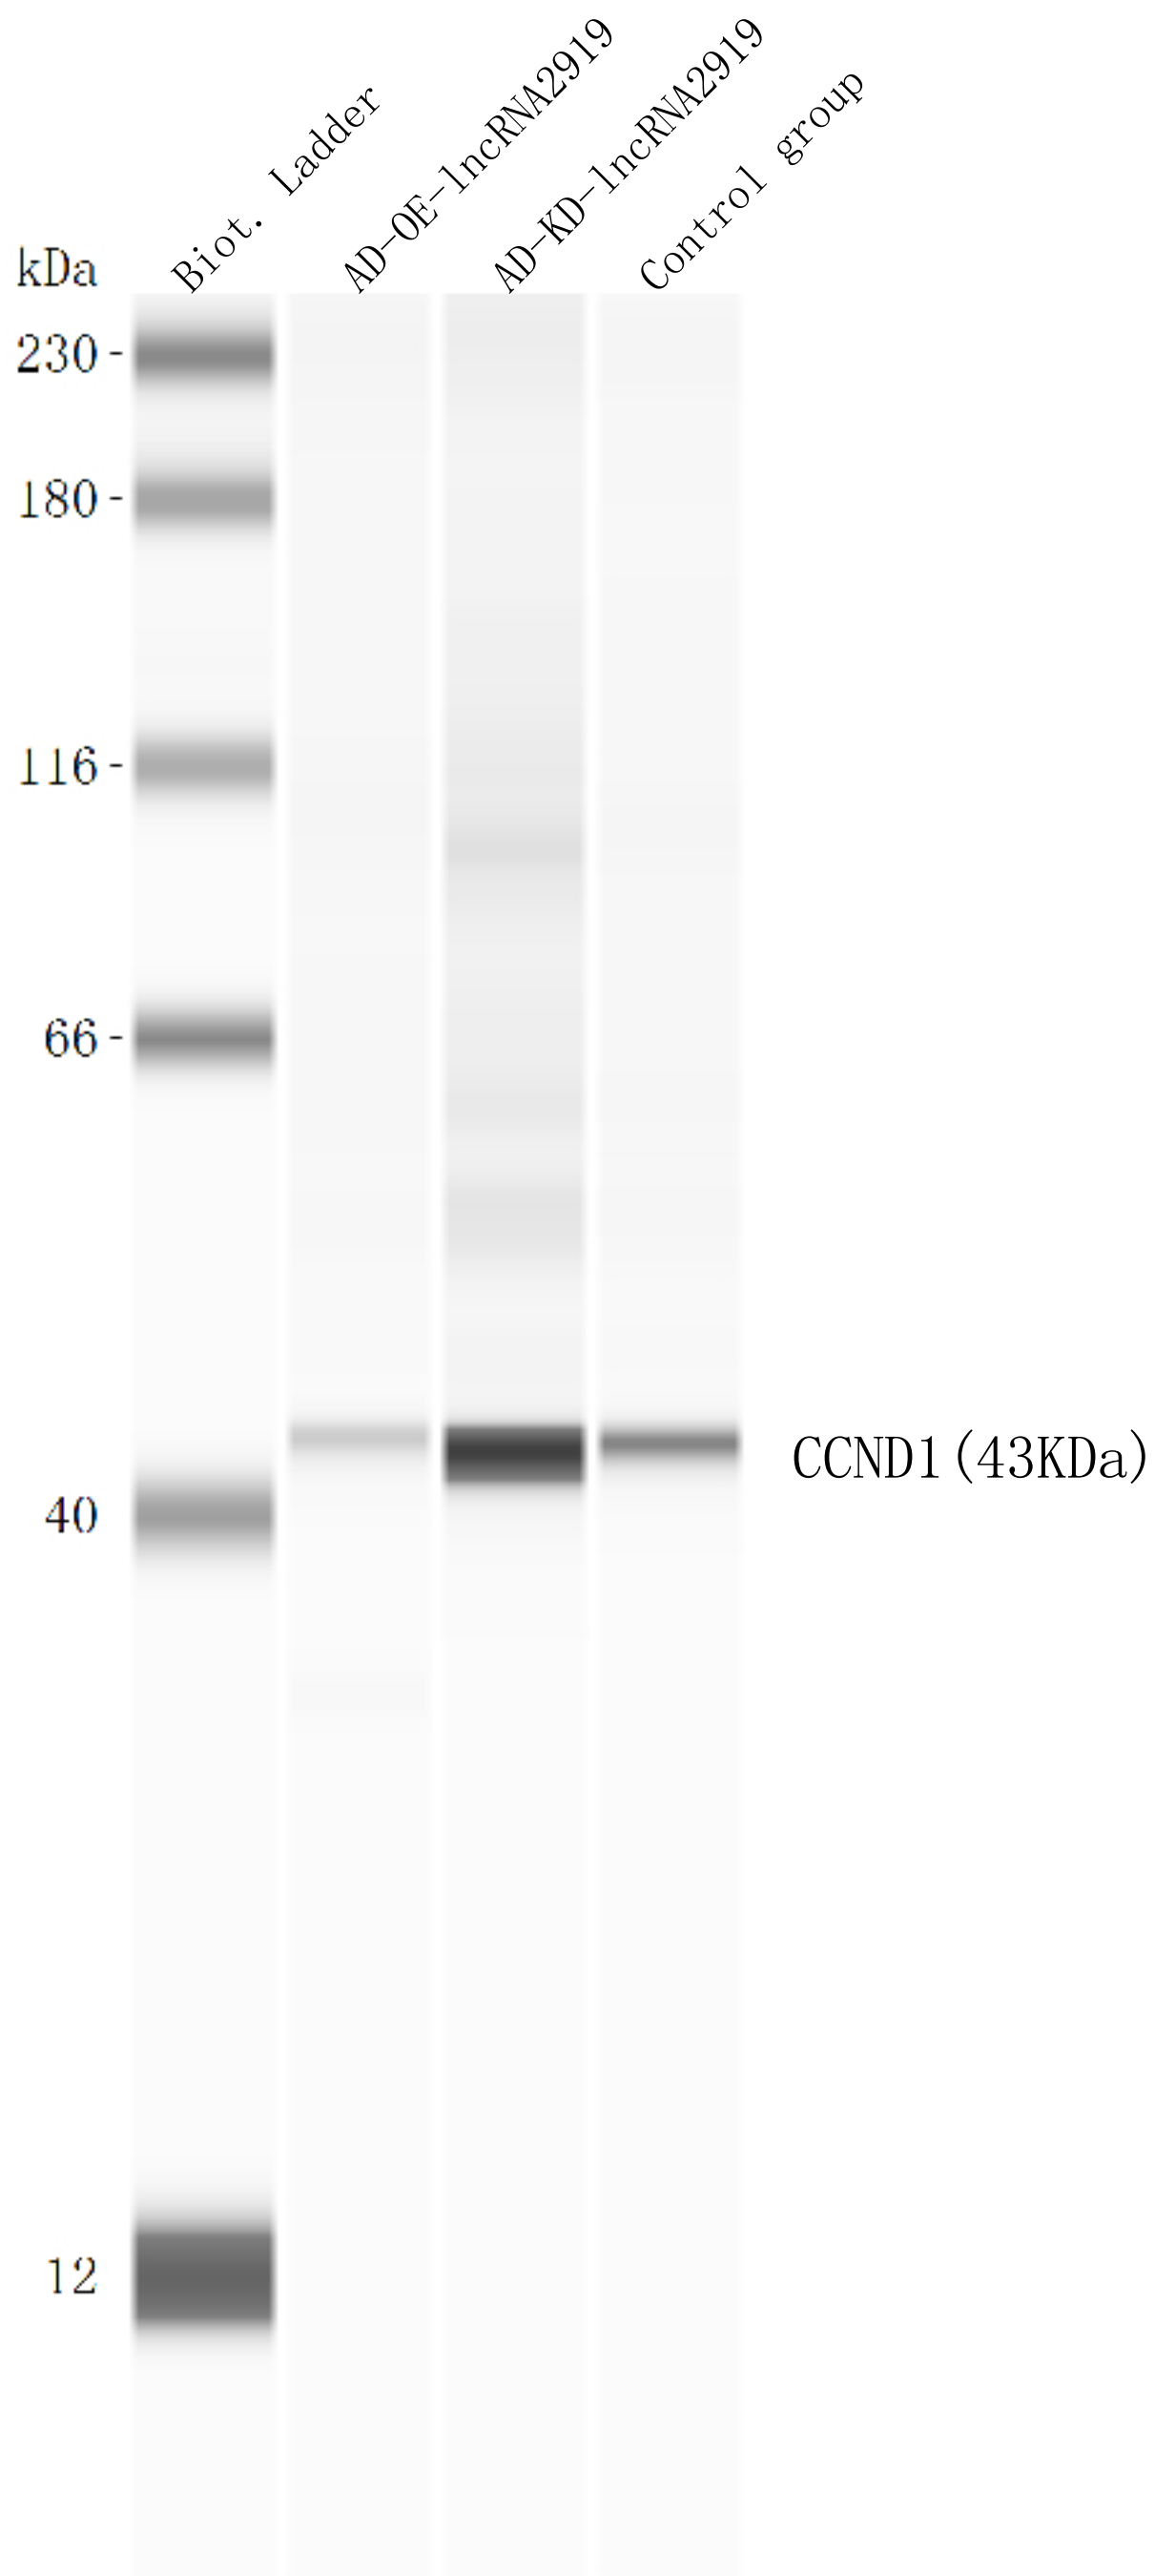

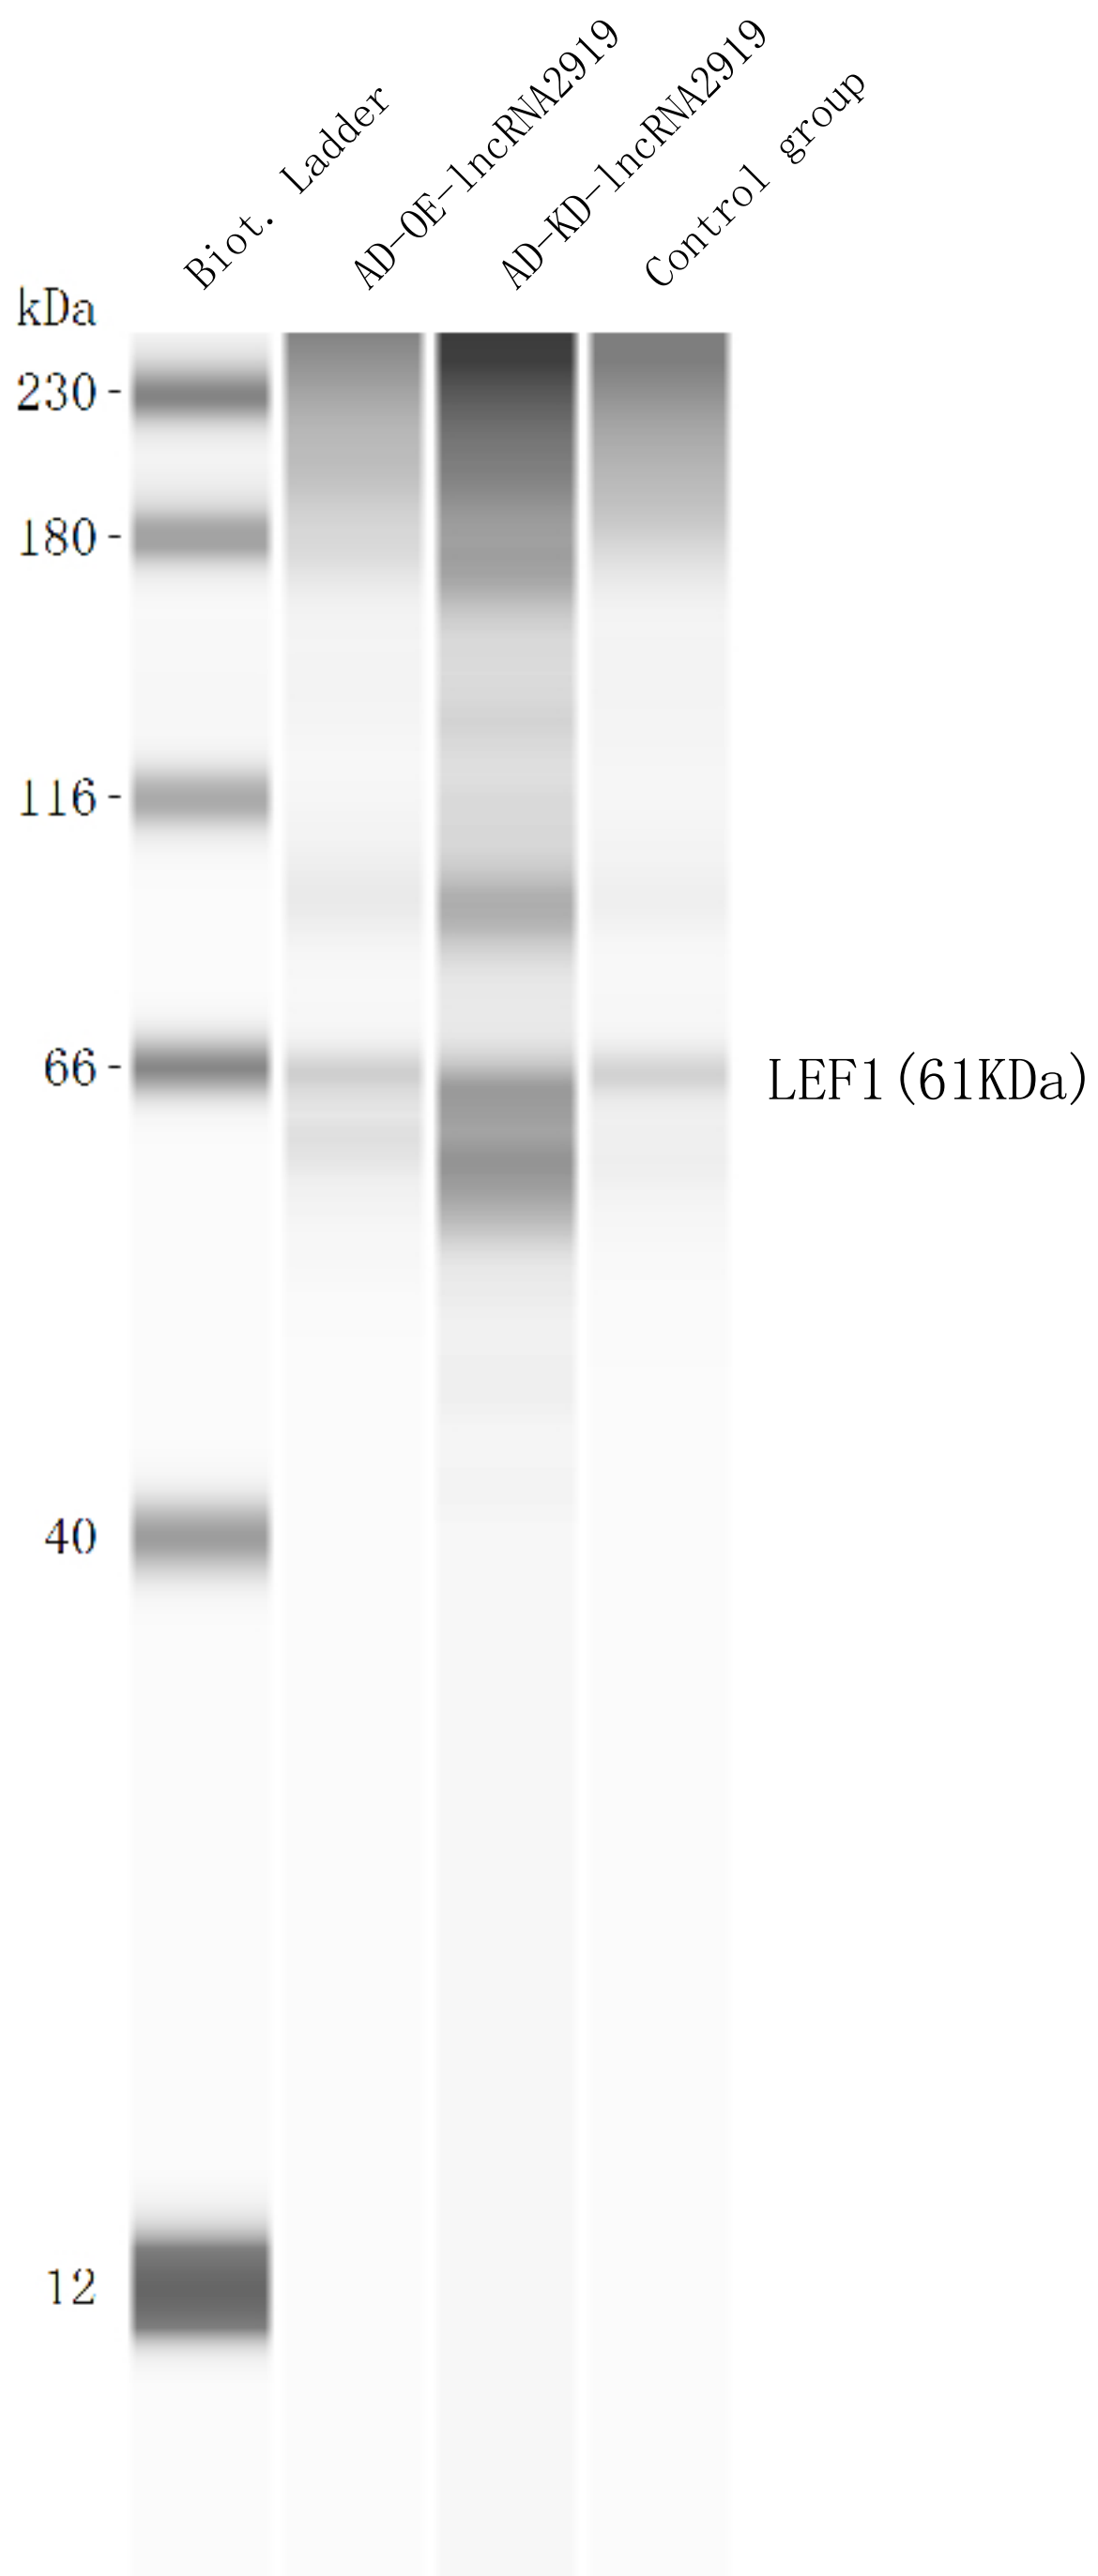

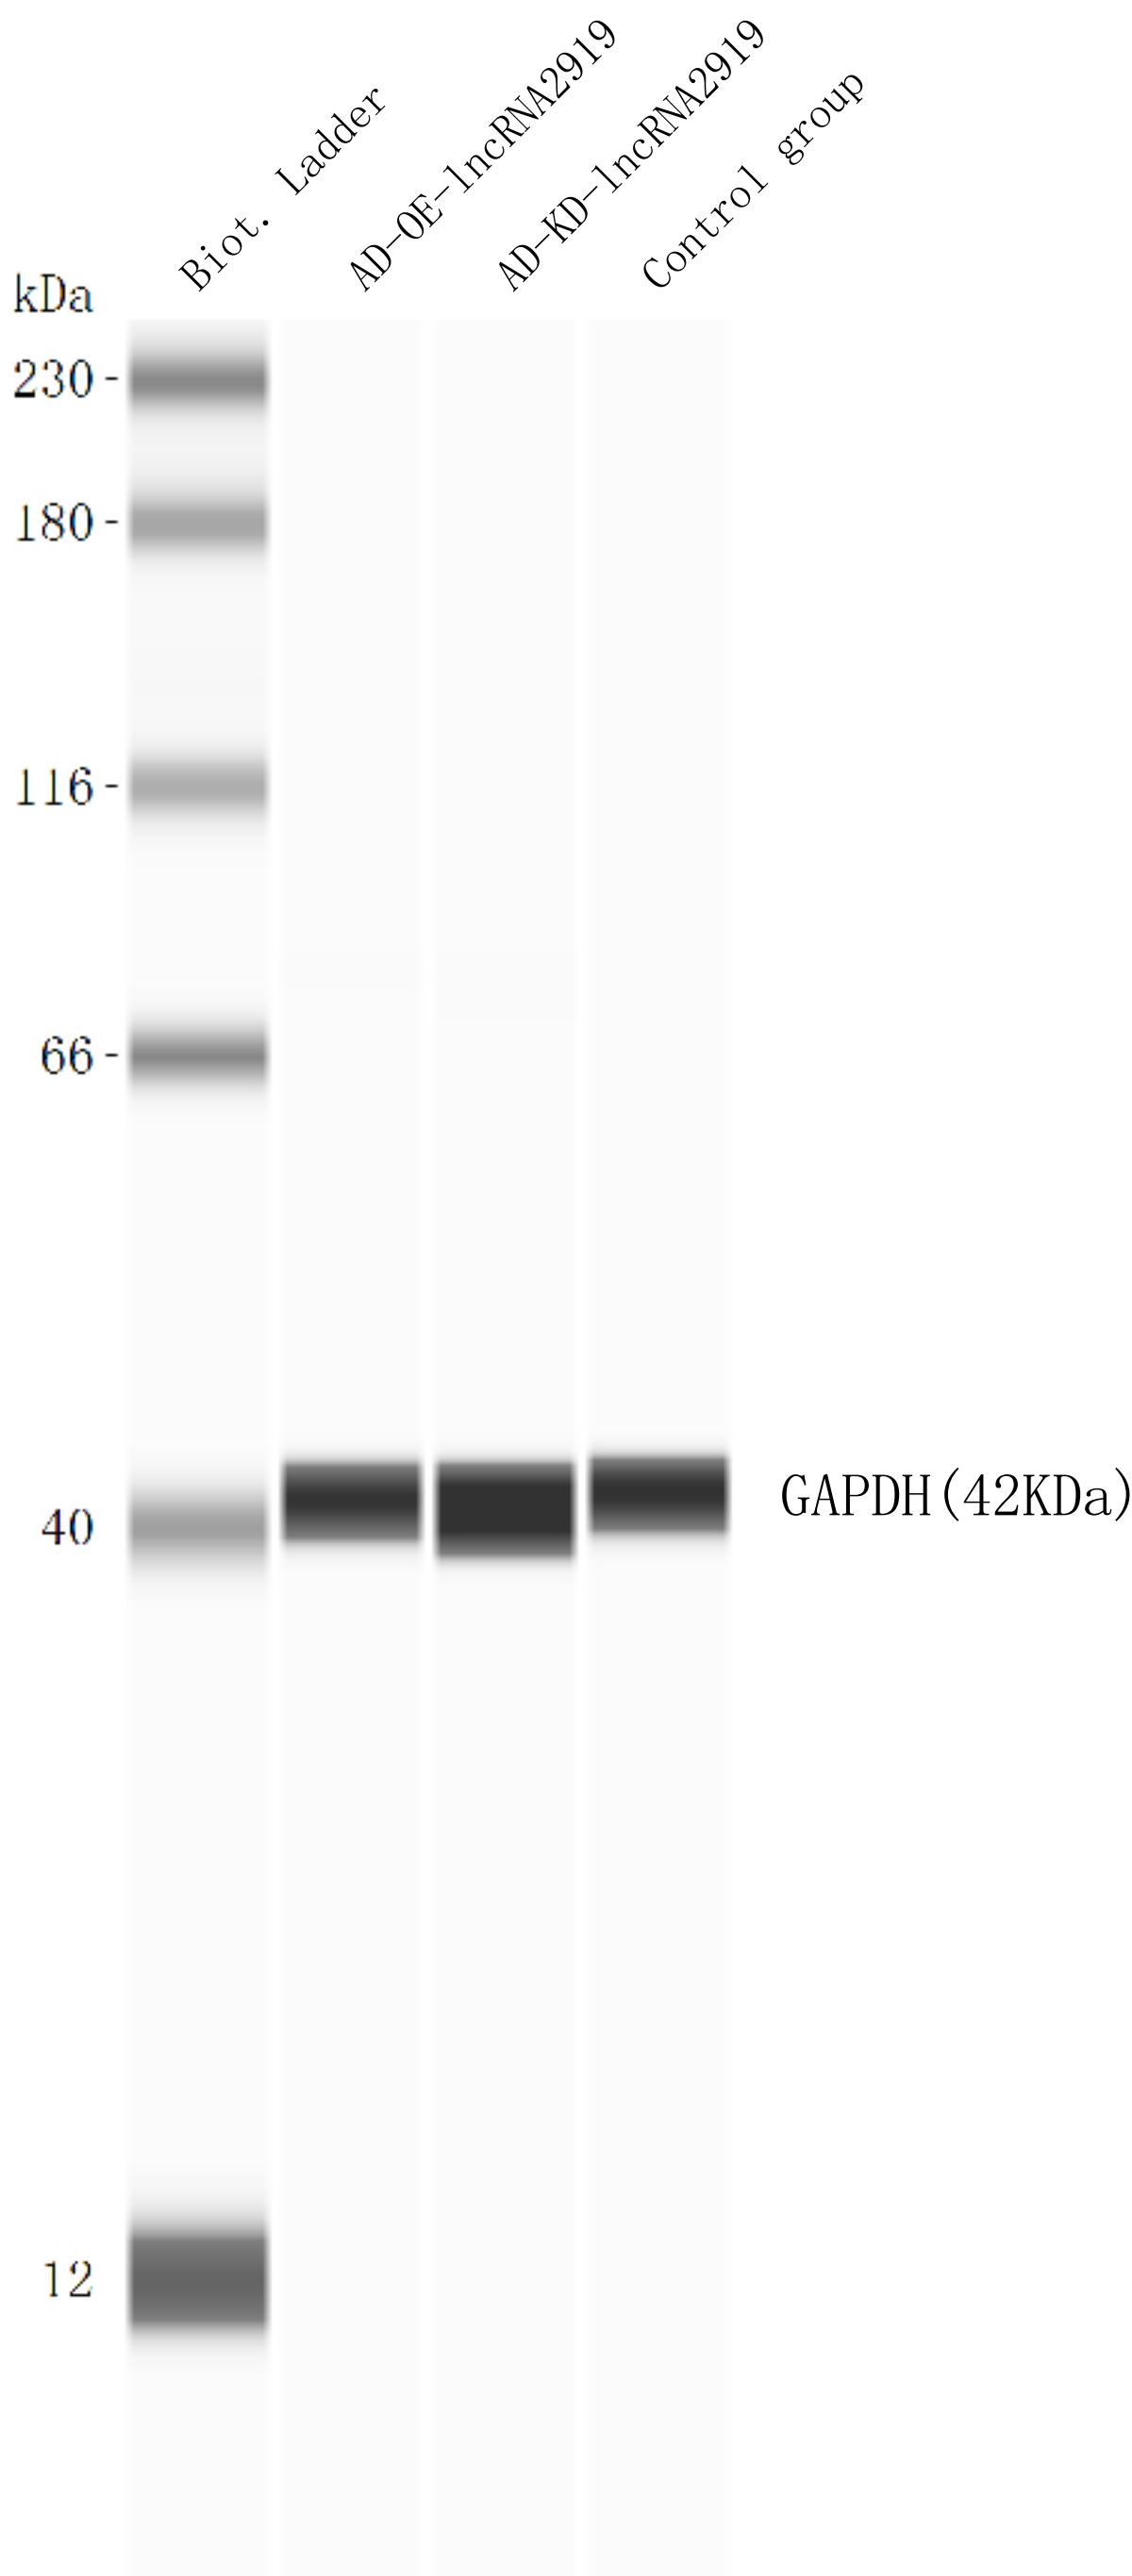

Supplement: s1 [file s1]
